# Supplementary material for: Efficacy of Acupuncture in the Treatment of Essential Hypertension: An Overview of Systematic Reviews and Meta-Analyses
Source: Research Square preprint supplement (doi:10.21203/rs.3.rs-2183175/v1), 2022-11-14
Supplement: Supplementary file 2 [file 7b645c8dba66c3ea3cfcb0e5.pdf]

**Table 6 Results of evidence quality.**

| Author<br>, year                       | Outcomes                                             | Intervention<br>vs.<br>comparison                        | Studies<br>(participants) | Limitations | Inconsistency | Indirectness | Imprecision | Publication bias | Relative effect<br>(*95% CI)   | Heterogeneity         | Quality |
|----------------------------------------|------------------------------------------------------|----------------------------------------------------------|---------------------------|-------------|---------------|--------------|-------------|------------------|--------------------------------|-----------------------|---------|
| <b>Liu FS,<br/>2012<br/>[26]</b>       | The effective<br>rate of lowering<br>blood pressure  | acupuncture vs. western<br>medicine                      | 7(612)                    | -1①         | 0             | 0            | -1③         | 0                | OR = 0.93<br>(0.60,1.45)       | I <sup>2</sup> =49%   | L       |
|                                        |                                                      | acupuncture+ western<br>medicine vs. western<br>medicine | 3(175)                    | -1①         | 0             | 0            | -1③         | -1⑤              | OR = 2.95<br>(1.45,6.01)       | I <sup>2</sup> =0%    | VL      |
|                                        | The effective<br>rate of<br>improving<br>symptoms    | acupuncture vs. western<br>medicine                      | 3(180)                    | -1①         | 0             | 0            | -1③         | -1⑤              | OR = 2.56<br>(1.22,5.39 )      | I <sup>2</sup> =0%    | VL      |
|                                        |                                                      | acupuncture+ western<br>medicine vs. western<br>medicine | 1(60)                     | -1①         | 0             | 0            | -2③         | -1⑤              | OR = 9.33,<br>(1.87,46.68)     | I <sup>2</sup> =0%    | VL      |
| <b>Yu<br/>H,2013<br/>[27]</b>          | The effective<br>rate of lowering<br>blood pressure  | acupuncture vs. western<br>medicine                      | 14(1164)                  | -1①         | -1②           | 0            | 0           | 0                | RR = 1.036,<br>(0.946, 1.135)  | I <sup>2</sup> =64.7% | L       |
|                                        | The efficacy of<br>improving SBP                     |                                                          | 10(768)                   | -1①         | -1②           | 0            | 0           | 0                | SMD = -0.12<br>(-0.378,0.129)  | I <sup>2</sup> =66.4% | L       |
|                                        | The efficacy of<br>improving DBP                     |                                                          | 10(768)                   | -1①         | 0             | 0            | 0           | 0                | SMD = -0.051<br>(-0.195,0.092) | I <sup>2</sup> =44.9% | M       |
| <b>Zhang<br/>LL,<br/>2013<br/>[28]</b> | The effect of<br>reducing the<br>magnitude of<br>SBP | acupuncture vs. western<br>medicine                      | 8(772)                    | -1①         | -1②           | 0            | -1③         | 0                | MD = 1.35<br>( 0.11,2.59)      | I <sup>2</sup> =90%   | VL      |
|                                        |                                                      | acupuncture+western                                      | 2(140)                    | -1①         | 0             | 0            | -1③         | -1⑤              | MD = 8.30                      | I <sup>2</sup> =13%   | VL      |

|                    |                                             |                                                                                                  |        |     |     |   |     |     |                             |                     |    |
|--------------------|---------------------------------------------|--------------------------------------------------------------------------------------------------|--------|-----|-----|---|-----|-----|-----------------------------|---------------------|----|
|                    |                                             | medicine vs. western medicine                                                                    |        |     |     |   |     |     | (5.51, 11.09)               |                     |    |
|                    |                                             | acupuncture vs. sham acupuncture                                                                 | 1(160) | -1① | -1② | 0 | -1③ | -1⑤ | MD = 7.00<br>(4.67,9.33)    | Not applicable      | VL |
|                    | The effect of reducing the magnitude of DBP | acupuncture vs. western medicine                                                                 | 8(772) | -1① | -1② | 0 | -1③ | 0   | MD = 0.52<br>(-1.43,2.46)   | I <sup>2</sup> =78% | VL |
|                    |                                             | acupuncture+western medicine vs. western medicine                                                | 2(140) | -1① | 0   | 0 | -1③ | -1⑤ | MD = 4.66<br>(2.88,6.45)    | I <sup>2</sup> =0%  | VL |
|                    |                                             | acupuncture vs. sham acupuncture                                                                 | 1(160) | -1① | -1② | 0 | -1③ | -1⑤ | MD = 3.0<br>(1.29,4.71)     | Not applicable      | VL |
| Qian YX, 2013 [29] | The efficacy of improving 24h SBP           | acupuncture vs. sham acupuncture                                                                 | 1      | -1① | -1② | 0 | -1③ | -1⑤ | MD=-5.55<br>(-8.72,-1.28)   | No information      | VL |
|                    |                                             | acupuncture+traditional therapy(western medicine/lifestyle modification) vs. traditional therapy | 2      | -1① | -1② | 0 | -1③ | -1⑤ | MD=-7.51<br>(-10.37,-4.65)  | No information      | VL |
|                    | The efficacy of improving 24h DBP           | acupuncture vs. sham acupuncture                                                                 | 1      | -1① | -1② | 0 | -1③ | -1⑤ | No statistical significance | No information      | VL |
|                    |                                             | acupuncture+traditional therapy(western medicine/lifestyle modification) vs. traditional therapy | 2      | -1① | -1② | 0 | -1③ | -1⑤ | MD=-2.27<br>(-4.32,-0.22)   | No information      | VL |

|                    |                                               |                                                                                                  |         |     |     |   |     |     |                             |                     |    |
|--------------------|-----------------------------------------------|--------------------------------------------------------------------------------------------------|---------|-----|-----|---|-----|-----|-----------------------------|---------------------|----|
|                    | The efficacy of improving 12h SBP             | acupuncture vs. sham acupuncture                                                                 | 1       | -1① | -1② | 0 | -1③ | -1⑤ | MD=-5.00 (-8.56,-1.44)      | No information      | VL |
|                    |                                               | acupuncture+traditional therapy(western medicine/lifestyle modification) vs. traditional therapy | 6       | -1① | -1② | 0 | -1③ | 0   | MD=-7.66 (-9.45,-5.86)      | No information      | VL |
|                    | The efficacy of improving 12h DBP             | acupuncture vs. sham acupuncture                                                                 | 1       | -1① | -1② | 0 | -1③ | -1⑤ | No statistical significance | No information      | VL |
|                    |                                               | acupuncture+traditional therapy(western medicine/lifestyle modification) vs. traditional therapy | 6       | -1① | -1② | 0 | -1③ | 0   | MD=-2.87 (-4.16,-1.57)      | No information      | VL |
| Guo W, 2013 [30]   | The effective rate of lowering blood pressure | acupuncture+western medicine vs. western medicine                                                | 10(679) | -1① | 0   | 0 | -1③ | 0   | OR=5.23 (3.24,8.44)         | I <sup>2</sup> =0%  | L  |
|                    | The efficacy of improving SBP                 |                                                                                                  | 4(275)  | -1① | 0   | 0 | -1③ | 0   | MD=-8.35 (-10.89,-5.81)     | I <sup>2</sup> =0%  | L  |
|                    | The efficacy of improving DBP                 |                                                                                                  | 4(275)  | -1① | -1② | 0 | -1③ | 0   | MD= -6.33 (-7.97,-4.69)     | I <sup>2</sup> =92% | VL |
| Zhang YJ,2014 [31] | The effective rate of lowering blood pressure | acupuncture vs. western medicine                                                                 | 7(612)  | -1① | -1② | 0 | -1③ | 0   | OR= 0.95 (0.45,2.00)        | I <sup>2</sup> =55% | VL |
|                    |                                               | acupuncture+western medicine vs. western medicine                                                | 4(262)  | -1① | 0   | 0 | -1③ | 0   | OR=5.13 (2.60,10.11)        | I <sup>2</sup> = 0% | L  |

|                         |                                                     |                                                         |          |     |     |   |     |     |                             |                      |    |
|-------------------------|-----------------------------------------------------|---------------------------------------------------------|----------|-----|-----|---|-----|-----|-----------------------------|----------------------|----|
| Zhang<br>L,2017<br>[32] | The efficacy of<br>improving SBP                    | acupuncture vs. western<br>medicine                     | 3(180)   | -1① | 0   | 0 | -1③ | -1⑤ | WMD=- 3.26<br>(- 7.98,1.46) | I <sup>2</sup> =0%   | VL |
|                         |                                                     | acupuncture+western<br>medicine vs. western<br>medicine | 2(152)   | -1① | 0   | 0 | -1③ | -1⑤ | WMD=-9.50<br>(-13.66,-5.34) | I <sup>2</sup> =0%   | VL |
|                         | The efficacy of<br>improving DBP                    | acupuncture vs. western<br>medicine                     | 3(180)   | -1① | 0   | 0 | -1③ | -1⑤ | WMD=-2.17<br>(-5.02,0.68)   | I <sup>2</sup> =0%   | VL |
|                         |                                                     | acupuncture+western<br>medicine vs. western<br>medicine | 2(152)   | -1① | 0   | 0 | -1③ | -1⑤ | WMD=- 0.16<br>(-2.52,2.19)  | I <sup>2</sup> =0%   | VL |
|                         | The efficacy of<br>improving SBP                    | acupuncture vs. western<br>medicine                     | 23(1705) | -1① | -1② | 0 | 0   | -1④ | SMD=-0.66<br>(-1.03,-0.29)  | I <sup>2</sup> = 92% | VL |
|                         |                                                     | acupuncture+western<br>medicine vs. western<br>medicine | 11(1029) | -1① | 0   | 0 | 0   | -1④ | SMD=-1.14<br>(-1.31,-0.96)  | I <sup>2</sup> =38%  | L  |
|                         | The efficacy of<br>improving DBP                    | acupuncture vs. western<br>medicine                     | 23(1705) | -1① | -1② | 0 | 0   | -1④ | SMD=-0.61<br>(-1.02,-0.21)  | I <sup>2</sup> =93%  | VL |
|                         |                                                     | acupuncture+western<br>medicine vs. western<br>medicine | 11(1029) | -1① | -1② | 0 | 0   | -1④ | SMD=-1.10<br>(-1.63,-0.58)  | I <sup>2</sup> =93%  | VL |
|                         | The effective<br>rate of lowering<br>blood pressure | acupuncture vs. western<br>medicine                     | 28(2271) | -1① | -1② | 0 | 0   | -1④ | RR=1.10<br>(1.03,1.17)      | I <sup>2</sup> =69%  | VL |
|                         |                                                     | acupuncture+western<br>medicine vs. western<br>medicine | 14(1125) | -1① | 0   | 0 | 0   | -1④ | RR=1.19<br>(1.13,1.25)      | I <sup>2</sup> =5%   | L  |
|                         | The effective                                       | acupuncture vs. western                                 | 7(465)   | -1① | 0   | 0 | 0   | -1④ | RR=1.21                     | I <sup>2</sup> =0%   | L  |

|                        |                                               |                                                                                        |          |     |     |   |     |      |                               |                     |    |
|------------------------|-----------------------------------------------|----------------------------------------------------------------------------------------|----------|-----|-----|---|-----|------|-------------------------------|---------------------|----|
|                        | rate of improving symptoms                    | medicine                                                                               |          |     |     |   |     |      | (1.11,1.31)                   |                     |    |
|                        |                                               | acupuncture+western medicine vs. western medicine                                      | 3(276)   | -1① | 0   | 0 | 0   | -1④  | RR=1.19<br>(1.09,1.31)        | I <sup>2</sup> =12% | L  |
|                        | The effective rate of comprehensive treatment | acupuncture vs. western medicine                                                       | 5(394)   | -1① | -1② | 0 | 0   | -1④  | RR=1.38<br>(1.14,1.66)        | I <sup>2</sup> =61% | VL |
|                        |                                               | acupuncture+western medicine vs. western medicine                                      | 2(184)   | -1① | 0   | 0 | 0   | -1④⑤ | RR=1.20<br>(1.07,1.33)        | I <sup>2</sup> =0%  | L  |
| <b>Zhu T,2018 [33]</b> | The effective rate of comprehensive treatment | acupuncture vs. western medicine/<br>acupuncture+western medicine vs. western medicine | 22(1758) | -1① | 0   | 0 | -1③ | 0    | OR=2.49<br>(1.92,4.24)        | I <sup>2</sup> =47% | L  |
|                        | The efficacy of improving SBP                 | medicine/<br>acupuncture+behavior                                                      | 13(908)  | -1① | -1② | 0 | 0   | 0    | WMD=-4.50<br>(-6.45,-2.55)    | I <sup>2</sup> =86% | L  |
|                        | The efficacy of improving DBP                 | therapy vs. western medicine                                                           | 13(908)  | -1① | -1② | 0 | 0   | 0    | WMD=-3.14<br>(-4.61,-1.66)    | I <sup>2</sup> =86% | L  |
| <b>Han S,2019 [34]</b> | The effective rate of comprehensive treatment | acupuncture+Tianma Gouteng Decoction vs. western medicine/Tianma                       | 6(694)   | -1① | 0   | 0 | -1③ | -1④  | OR = 5.39<br>(2.97,9.80)      | I <sup>2</sup> =0%  | VL |
|                        | The efficacy of improving SBP                 | Gouteng Decoction                                                                      | 3(358)   | -1① | -1② | 0 | -1③ | -1④  | OR =-15.49<br>(-18.48,-12.50) | I <sup>2</sup> =53% | VL |
|                        | The efficacy of improving DBP                 |                                                                                        | 3(358)   | -1① | 0   | 0 | -1③ | -1④  | OR= -9.71<br>(- 11.84, -7.57) | I <sup>2</sup> =50% | VL |
| <b>Lee</b>             | The effect of                                 | acupuncture vs. sham                                                                   | 3(358)   | -1① | -1② | 0 | -1③ | 0    | MD=-5                         | I <sup>2</sup> =92% | VL |

|                             |                                             |                                                                                         |        |     |     |   |     |     |                            |                      |    |
|-----------------------------|---------------------------------------------|-----------------------------------------------------------------------------------------|--------|-----|-----|---|-----|-----|----------------------------|----------------------|----|
| <b>H,2009<br/>[35]</b>      | reducing the magnitude of SBP               | acupuncture                                                                             |        |     |     |   |     |     | (-12,1)                    |                      |    |
|                             |                                             | acupuncture+medication vs. sham acupuncture+western medicine                            | 2(170) | -1① | 0   | 0 | -1③ | -1⑤ | MD=-8<br>(-10,-5)          | I <sup>2</sup> =0%   | VL |
|                             | The effect of reducing the magnitude of DBP | acupuncture vs. sham acupuncture                                                        | 3(358) | -1① | -1② | 0 | -1③ | 0   | MD=-3<br>(-6,0)            | I <sup>2</sup> =79%  | VL |
|                             |                                             | acupuncture+medication vs. sham acupuncture+western medicine                            | 2(170) | -1① | 0   | 0 | -1③ | -1⑤ | MD=-4<br>(-6,-2)           | I <sup>2</sup> =0%   | VL |
| <b>Li DZ, 2014<br/>[36]</b> | The efficacy of improving SBP               | electroacupuncture/auricular acupuncture vs. sham acupuncture                           | 2(216) | -1① | 0   | 0 | -1③ | 0   | MD=1.33<br>(-2.50,5.16)    | I <sup>2</sup> =44%  | L  |
|                             |                                             | electroacupuncture/auricular acupuncture or+antihypertensive drugs vs. sham acupuncture | 2(170) | -1① | 0   | 0 | -1③ | -1⑤ | MD=-8.58<br>(-10.13,-7.03) | I <sup>2</sup> =17%  | VL |
|                             | The efficacy of improving DBP               | electroacupuncture/auricular acupuncture vs. sham acupuncture                           | 2(216) | -1① | -1② | 0 | -1③ | 0   | MD=-0.18<br>(-3.98,3.62)   | I <sup>2</sup> = 63% | VL |
|                             |                                             | electroacupuncture/auricular acupuncture or+antihypertensive drugs vs. sham             | 2(170) | -1① | 0   | 0 | 0   | -1⑤ | MD=-4,54<br>(-5.08, -4.00) | I <sup>2</sup> =0%   | L  |

|                             |                                                      |                                                                             |        |     |     |   |     |     |                            |                     |    |
|-----------------------------|------------------------------------------------------|-----------------------------------------------------------------------------|--------|-----|-----|---|-----|-----|----------------------------|---------------------|----|
|                             |                                                      | acupuncture                                                                 |        |     |     |   |     |     |                            |                     |    |
| Zhao<br>XF,<br>2015<br>[37] | The efficacy of<br>improving SBP                     | acupuncture vs. western<br>medicine                                         | 7(510) | -1① | -1② | 0 | -1③ | 0   | MD=-0.56<br>(-3.02,1.89)   | I <sup>2</sup> =60% | VL |
|                             |                                                      | acupuncture+western<br>medicine vs. western<br>medicine                     | 3(170) | -1① | -1② | 0 | -1③ | -1⑤ | MD=-9.04<br>(-20.11,2.02)  | I <sup>2</sup> =94% | VL |
|                             |                                                      | acupuncture+lifestyle<br>modification vs. lifestyle<br>modification         | 1(60)  | -1① | -1② | 0 | -1③ | -1⑤ | MD=-10.53<br>(-27.52,6.46) | Not applicable      | VL |
|                             | The efficacy of<br>improving DBP                     | acupuncture vs. western<br>medicine                                         | 7(510) | -1① | 0   | 0 | -1③ | 0   | MD=-1.01<br>(-2.26,0.24)   | I <sup>2</sup> =23% | L  |
|                             |                                                      | acupuncture+western<br>medicine vs. western<br>medicine                     | 3(170) | -1① | -1② | 0 | -1③ | -1⑤ | MD=-2.87<br>(-8.45,2.72)   | I <sup>2</sup> =86% | VL |
|                             |                                                      | acupuncture+lifestyle<br>modification vs. lifestyle<br>modification         | 1(60)  | -1① | -1② | 0 | -1③ | -1⑤ | MD=-7.52<br>(-15.06,0.02)  | Not applicable      | VL |
|                             | The effect of<br>reducing the<br>magnitude of<br>SBP | acupuncture vs. sham<br>acupuncture                                         | 2(216) | -1① | 0   | 0 | 0   | 0   | MD=0.30<br>(-0.27,0.88)    | I <sup>2</sup> =0%  | M  |
|                             |                                                      | acupuncture+western<br>medicine vs. sham<br>acupuncture+western<br>medicine | 2(170) | -1① | 0   | 0 | -1③ | -1⑤ | MD=-7.47<br>(-10.43,-4.51) | I <sup>2</sup> =0%  | VL |
|                             | The effect of<br>reducing the<br>magnitude of        | acupuncture vs. sham<br>acupuncture                                         | 2(216) | -1① | 0   | 0 | -1③ | 0   | MD=-1.40<br>(-2.37,-0.44)  | I <sup>2</sup> =8%  | L  |
|                             |                                                      | acupuncture+western                                                         | 2(170) | -1① | 0   | 0 | -1③ | -1⑤ | MD=-4.22                   | I <sup>2</sup> =0%  | VL |

|                                 |                                                     |                                                                       |        |     |     |   |     |      |                          |                     |    |
|---------------------------------|-----------------------------------------------------|-----------------------------------------------------------------------|--------|-----|-----|---|-----|------|--------------------------|---------------------|----|
|                                 | DBP                                                 | medicine vs. sham<br>acupuncture+western<br>medicine                  |        |     |     |   |     |      | (-6.26,-2.18)            |                     |    |
| <b>Chen<br/>H,2018<br/>[38]</b> | The effective<br>rate of lowering<br>blood pressure | acupuncture vs.<br>anti-hypertensive drugs                            | 9(517) | -1① | -1② | 0 | 0   | -1④  | RR=1.12<br>(0.98,1.28)   | I <sup>2</sup> =78% | VL |
|                                 |                                                     | acupuncture+lifestyle<br>modifications vs. lifestyle<br>modifications | 2(187) | -1① | 0   | 0 | 0   | -1④⑤ | RR=1.2<br>(1.05,1.36)    | I <sup>2</sup> =0%  | L  |
|                                 |                                                     | acupuncture+anti-hypertensive<br>drugs vs.<br>antihypertensive drugs  | 7(517) | -1① | 0   | 0 | 0   | -1④  | RR=1.17<br>(1.08,1.27)   | I <sup>2</sup> =0%  | L  |
|                                 |                                                     | electro-acupuncture vs.<br>antihypertensive drugs                     | 2(99)  | -1① | 0   | 0 | 0   | -1④⑤ | RR=0.94<br>(0.76,1.16)   | I <sup>2</sup> =0%  | L  |
|                                 | The efficacy of<br>improving SBP                    | acupuncture vs.<br>antihypertensive drugs                             | 8(541) | -1① | 0   | 0 | -1③ | -1④  | MD=1.4<br>(-1.32,4.12)   | I <sup>2</sup> =57% | VL |
|                                 |                                                     | acupuncture<br>vs. no treatment                                       | 1(30)  | -1① | -1② | 0 | -1③ | -1④⑤ | MD=5.2<br>(-2.99,13.39)  | Not applicable      | VL |
|                                 |                                                     | acupuncture vs. sham<br>acupuncture                                   | 3(106) | -1① | 0   | 0 | -1③ | -1④⑤ | MD=1.59<br>(-4.63,7.8)   | I <sup>2</sup> =65% | VL |
|                                 |                                                     | acupuncture+lifestyle<br>modifications vs. lifestyle<br>modifications | 3(246) | -1① | -1② | 0 | -1③ | -1④  | MD=10.38<br>(6.72,14.04) | I <sup>2</sup> =86% | VL |



|  |                               |                                                                                 |        |     |     |   |     |      |                          |                     |    |
|--|-------------------------------|---------------------------------------------------------------------------------|--------|-----|-----|---|-----|------|--------------------------|---------------------|----|
|  |                               | acupuncture+antihypertensive drugs vs. antihypertensive drugs                   | 5(365) | -1① | -1② | 0 | -1③ | -1④  | MD=9.8<br>(2.95,16.65)   | I <sup>2</sup> =94% | VL |
|  |                               | acupuncture+antihypertensive drugs vs. Sham acupuncture +antihypertensive drugs | 2(170) | -1① | 0   | 0 | -1③ | -1④⑤ | MD=8.82<br>(5.1,12.54)   | I <sup>2</sup> =35% | VL |
|  |                               | electroacupuncture vs. antihypertensive drug                                    | 3(200) | -1① | -1② | 0 | -1③ | -1④  | MD=1.63<br>(-3.25,6.52)  | I <sup>2</sup> =57% | VL |
|  |                               | electroacupuncture+antihypertensive drugs vs. antihypertensive drugs            | 1(59)  | -1① | -1② | 0 | -1③ | -1④⑤ | MD=9.12<br>(3.96,14.28)  | Not applicable      | VL |
|  | The efficacy of improving DBP | acupuncture vs. antihypertensive drugs                                          | 8(541) | -1① | -1② | 0 | -1③ | -1④  | MD=2.04<br>(-0.59,4.67)  | I <sup>2</sup> =83% | VL |
|  |                               | acupuncture vs. no treatment                                                    | 1(30)  | -1① | -1② | 0 | -1③ | -1④⑤ | MD=6.1<br>(1.27,10.93)   | Not applicable      | VL |
|  |                               | acupuncture vs. sham acupuncture                                                | 3(106) | -1① | 0   | 0 | -1③ | -1④⑤ | MD=-0.01<br>(-2.59,2.57) | I <sup>2</sup> =15% | VL |
|  |                               | acupuncture+lifestyle modifications vs. lifestyle modifications                 | 3(246) | -1① | -1② | 0 | -1③ | -1④  | MD=5.74<br>(1.94, 9.54)  | I <sup>2</sup> =91% | VL |
|  |                               | acupuncture+antihypertensive drugs vs. antihypertensive drugs                   | 5(365) | -1① | -1② | 0 | -1③ | -1④  | MD=7.82<br>(4.67,10.96)  | I <sup>2</sup> =79% | VL |

|                          |                               |                                                                                |         |     |     |   |     |      |                          |                     |    |
|--------------------------|-------------------------------|--------------------------------------------------------------------------------|---------|-----|-----|---|-----|------|--------------------------|---------------------|----|
|                          |                               | acupuncture+antihypertensive drugs vs. Sham acupuncture+antihypertensive drugs | 2(170)  | -1① | 0   | 0 | -1③ | -1④⑤ | MD=4.44<br>(1.7,7.19)    | I <sup>2</sup> =36% | VL |
|                          |                               | electroacupuncture vs. antihypertensive drug                                   | 3(200)  | -1① | 0   | 0 | -1③ | -1④  | MD=-1.98<br>(-4.85,0.62) | I <sup>2</sup> =31% | VL |
|                          |                               | electroacupuncture+antihypertensive drugs vs. antihypertensive drugs           | 1(59)   | -1① | -1② | 0 | -1③ | -1④⑤ | MD=4.46<br>(-0.25,9.17)  | Not applicable      | VL |
| Zhang<br>MX,20<br>22[39] | The efficacy of improving SBP | acupuncture/electroacupuncture/needle warming                                  | 4(1176) | -1① | 0   | 0 | 0   | -1④  | MD=3.62<br>(1.34,5.90)   | I <sup>2</sup> =56% | L  |
|                          | The efficacy of improving DBP | therapy vs. antihypertensive drugs                                             | 4(1176) | -1① | 0   | 0 | 0   | -1④  | MD=3.12<br>(1.03,5.20)   | I <sup>2</sup> =77% | L  |

**Note:** VL: very low; L: low; M: moderate; H: high. ①The included studies have a large bias in methodology such as randomization, allocation concealment, and blinding. ②The confidence interval overlaps less or the I<sup>2</sup> value of the combined results was larger. ③The sample size from the included studies does not meet the optimal sample size or the confidence interval was not narrow enough. ④The funnel chart is asymmetry. ⑤Fewer studies were included, and their results were all positive, which may result in a large publication bias;\*The 95% confidence interval does not cross the invalid line.
